# Supplementary material for: Effects of Nitrogen Application Rate on Rhizosphere Microbial Diversity in Oilseed Rape (Brassica napus L.)
Source: MDPI journal article supplement (doi:10.3390/agronomy11081539), 2021-07-31
Supplement: s1 [file s1]

Supplementary Materials:

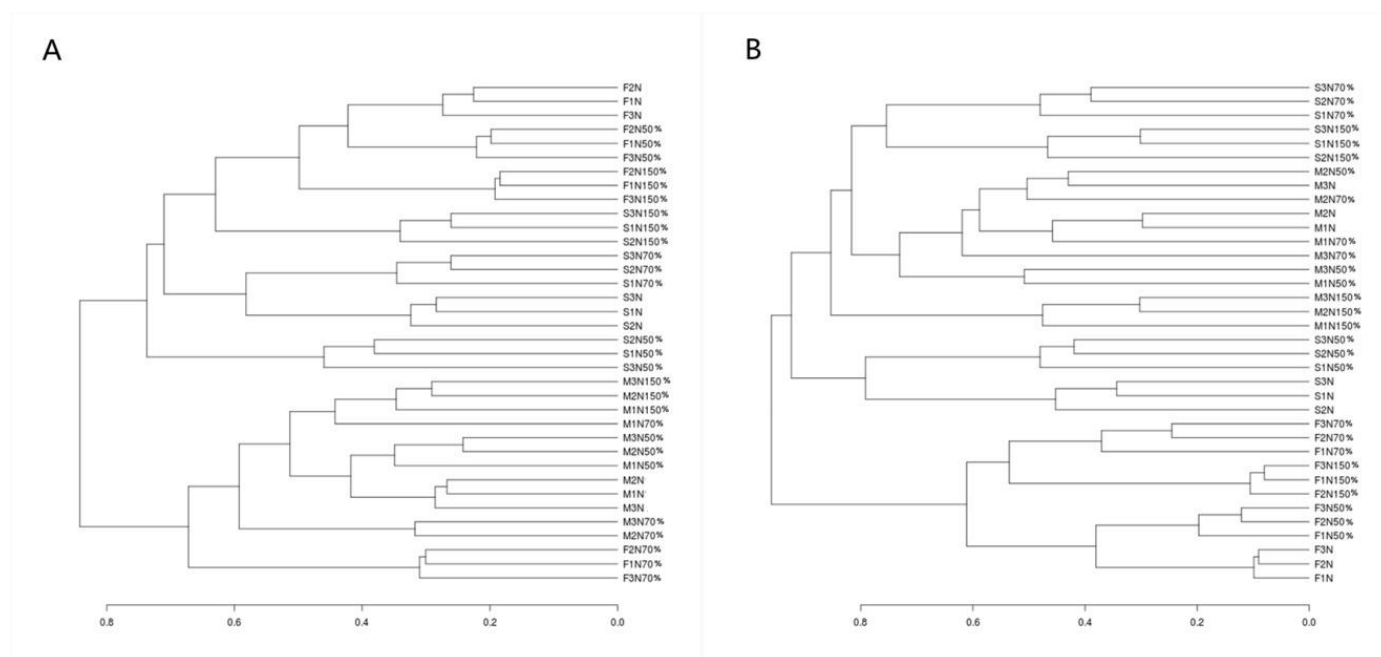

Figure S1. Hcluster of all samples. (A): Hierarchical clustering of bacterial; (B): Hierarchical clustering of fungi.
